# Supplementary material for: A novel FeS–NiS hybrid nanoarray: an efficient and durable electrocatalyst for alkaline water oxidation
Source: Royal Society of Chemistry journal article supplement (doi:10.1039/c9cc02007a), 2019-01-01
Supplement: c9cc02007a1.pdf [file c9cc02007a1.pdf]

## Electronic Supplementary Information

### Experimental section

**Materials:**  $\text{NH}_4\text{F}$ ,  $\text{Ni}(\text{NO}_3)_2 \cdot 6\text{H}_2\text{O}$  were purchased from Sinopharm Chemical Reagent Co., Ltd. Urea was purchased from Nanjing Chemical Reagent Co., Ltd.  $\text{Fe}(\text{NO}_3)_3 \cdot 9\text{H}_2\text{O}$  was purchased from Aladdin Ltd. (Shanghai, China).  $\text{RuCl}_3 \cdot 3\text{H}_2\text{O}$  ( $\geq 43\%$ ) was purchased from Sigma–Aldrich Chemical Reagent Co., Ltd. The plain weave 100 mesh Ti mesh with the diameter of 0.10mm was provided by Hongshan District, Wuhan Instrument Surgical Instruments Business. All reagents were analytical reagent grade and used as received without further purification.

**Preparation of hydroxide precursor:** In a typical synthesis process, 0.58 g  $\text{Ni}(\text{NO}_3)_2 \cdot 6\text{H}_2\text{O}$ , 0.09 g  $\text{Fe}(\text{NO}_3)_3 \cdot 9\text{H}_2\text{O}$ , 0.60 g urea, and 0.22 g  $\text{NH}_4\text{F}$  were dissolved in 40 mL deionized water under vigorous stirring for 10 min. Ti mesh was selected as the substrate due to its excellent chemical stability, acceptable electronic conductivity, three dimensional structure with high surface area, and open structure allowing solvent good access at the reaction interface. Ti mesh was cleaned by sonication in water and ethanol for 10 min, was immersed into the solution. Then the solution was transferred to a 50 mL Teflonlined stainless steel autoclave with a piece of Ti mesh (2 cm  $\times$  4 cm). Third, the autoclave was sealed and maintained at 120 °C for 6 h in an electric oven. After the autoclave cooled down naturally to room temperature, the NiFe–LDH/TM was taken out and thoroughly washed with deionized water, finally dried at 60 °C for 6 h in air. The hydroxide precursor of FeS/TM and NiS/TM were synthesised under same condition without  $\text{Ni}(\text{NO}_3)_2 \cdot 6\text{H}_2\text{O}$  and  $\text{Fe}(\text{NO}_3)_3 \cdot 9\text{H}_2\text{O}$ , respectively.

**Preparation of FeS–NiS/TM, FeS/TM and NiS/TM:** FeS–NiS/TM, FeS/TM and NiS/TM were obtained from corresponding hydroxide precursor via hydrothermal sulfurization reaction. In a typical synthesis process, 1.92 g  $\text{Na}_2\text{S}$  were dissolved in 40 mL deionized water. Then the solution was transferred to a 50 mL Teflonlined stainless steel autoclave with the hydroxide precursor. Third, the autoclave was sealed and maintained at 120 °C for 4 h in an electric oven. After the autoclave cooled down

naturally to room temperature, the hydroxide precursor was taken out and thoroughly washed with deionized water and ethanol several times, then dried at 60 °C for 6 h in air.

**Preparation of RuO<sub>2</sub>/TM electrode:** Preparation RuO<sub>2</sub> by 2.61 g of RuCl<sub>3</sub>·3H<sub>2</sub>O and 30 mL KOH (1.0 M) were dissolved in 100 mL solution under vigorous stirring for 10 min at 100 °C. Then the above solution was centrifuged for 10 minutes and filtered. The precipitates were collected and washed with water several times. Finally, the product was dried at 80 °C overnight and then annealed at 300 °C in air atmosphere for 3 h. For a typical synthesis of RuO<sub>2</sub>/TM electrode, 50 mg RuO<sub>2</sub> was dispersed in 1 mL ethane/water (v:v = 1:1) solution with sonication for 30 min. Then dropped on Ti mesh (0.5 × 0.5 cm), and dried at 80°C for 4 h.<sup>1</sup>

**Characterization:** The X-ray diffraction (XRD) patterns were obtained from were obtained from MiniFlex600 diffractometer (Rjgaku, Japan). Scanning electron microscope (SEM) measurements were recorded on a XL30 ESEM FEG scanning electron microscope at an accelerating voltage of 20 kV. The structures of the samples were determined by transmission electron microscopy (TEM) images on a HITACHI H-8100 electron microscopy (Hitachi, Tokyo, Japan) operated at 200 kV. X- ray photoelectron spectroscopy (XPS) data of the samples was collected on an Thermo ESCALAB 250XI x- ray photoelectron spectrometer using Mg as the exciting source.

**Electrochemical measurements:** Electrochemical measurements were performed with a CHI 660E electrochemical analyzer (CH Instruments, Inc., Shanghai) in a standard three-electrode system using FeS–NiS/TM as working electrode, graphite rod as the counter electrode, and a saturated Hg/HgO used as the reference electrode. All experiments were carried out at room temperature. All potentials measured were calibrated to RHE using the following equation:  $E(\text{RHE}) = E(\text{Hg/HgO}) + (0.098 + 0.059 \times \text{pH}) \text{ V}$ .

**TOF calculations:** The slope is derived from the linear relationship, the number of activity species is calculated by the formula:  $\text{slope} = n^2 F^2 m / 4RT$ ,  $n$  represents the number of electrons transferred, we assuming that the electron transferred process is

one electron process between FeS–NiS/TM and NiFe–LDH/TM,  $n$  is 1,  $F$  represents the faradaic constant ( $96485 \text{ C mol}^{-1}$ ),  $m$  is the amount of active species,  $R$  and  $T$  represent ideal gas constant and the absolute temperature, respectively. The TOF is employed by the following equation:  $\text{TOF} = jA/4Fm$  ( $j$  is the current density;  $A$  is the geometrical area of the electrode, and 4 indicates the moles of electron consumption for one mole oxygen evolution).

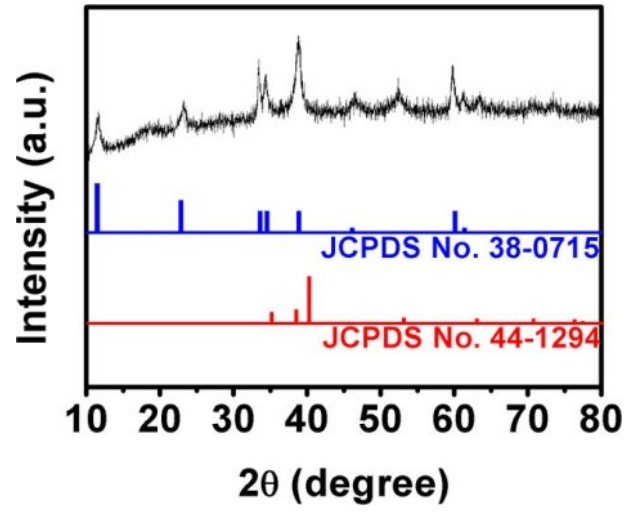

Fig. S1. XRD pattern of NiFe-LDH/TM.

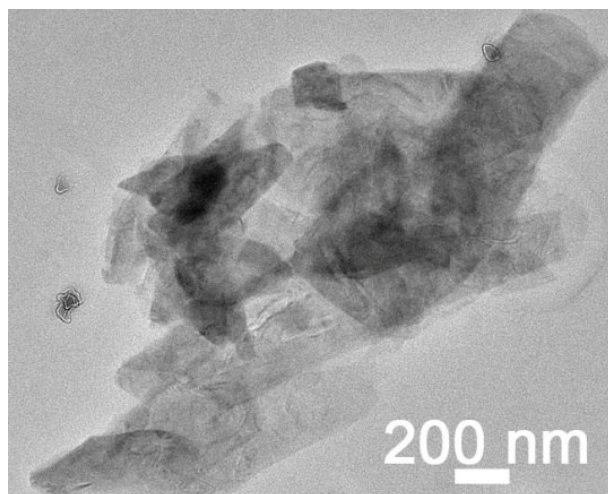

**Fig. S2.** TEM image for NiFe-LDH nanosheet.

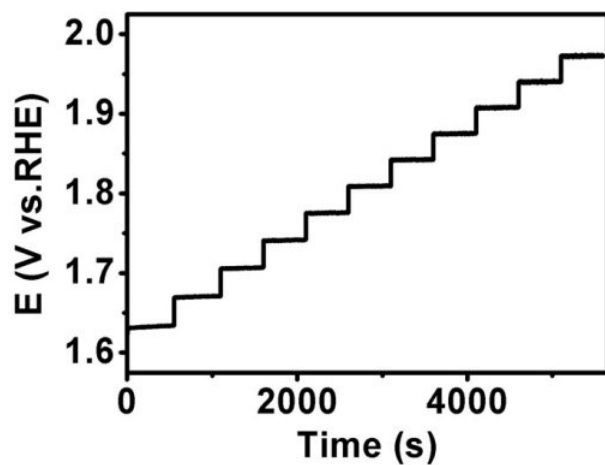

**Fig. S3.** Multi-current process of FeS–NiS/TM without iR correction.

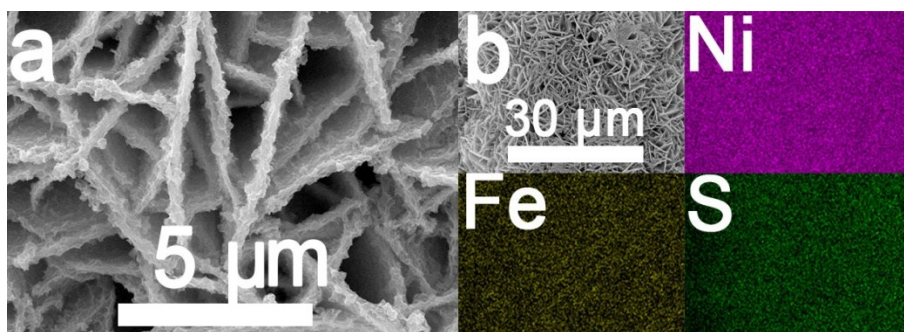

**Fig. S4.** (a) SEM image and (b) EDX elemental mapping images of Ni, Fe and S for FeS-NiS/TM after the durability test.

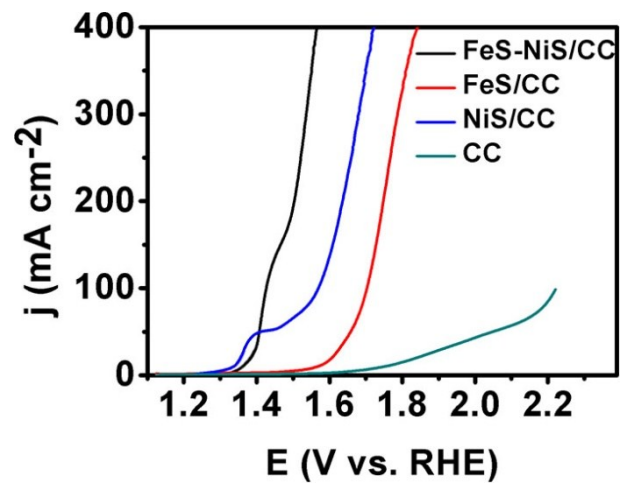

**Fig. S5.** LSV curves of CC and FeS-NiS/CC with a scan rate of 5 mV s<sup>-1</sup> in 1.0 M KOH.



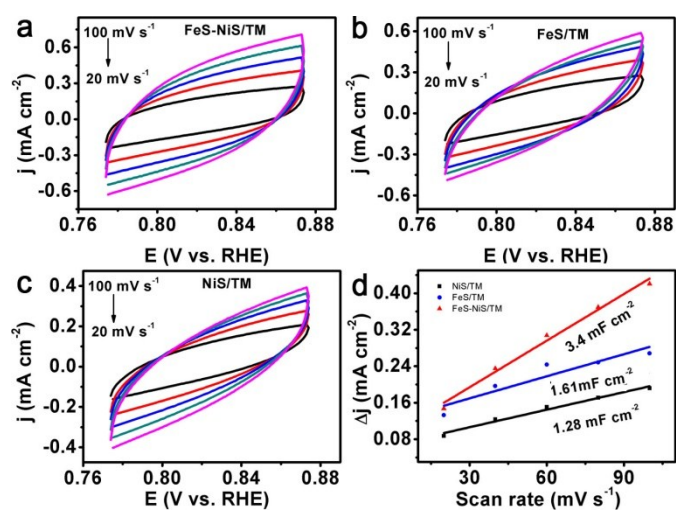

**Fig. S6.** CVs of (a) FeS–NiS/TM, (b) FeS/TM and (c) NiS/TM with various scan rates. (d) Capacitive current with various rates.

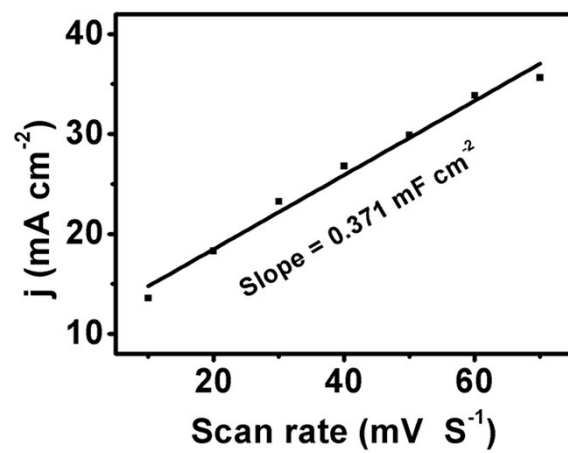

**Fig. S7.** Oxidation peak current versus scan rate plot for FeS–NiS/TM.

**Table S1.** Comparison of OER performance for FeS–NiS/TM with other non-noble-metal OER electrocatalysts in alkaline media.

| Catalyst                                                                | $j$ (mA cm <sup>-2</sup> ) | $\eta$ (mV) | Electrolyte | Ref.      |
|-------------------------------------------------------------------------|----------------------------|-------------|-------------|-----------|
| FeS–NiS/TM                                                              | 10                         | 260         | 1.0 M KOH   | This work |
| NiPS <sub>3</sub>                                                       | 10                         | 294         | 1.0 M KOH   | 2         |
| Ni@graphene                                                             | 10                         | ~370        | 1.0 M KOH   | 3         |
| Ni <sub>2</sub> P                                                       | 10                         | 290         | 1.0 M KOH   | 4         |
| NiS@N/S–C                                                               | 10                         | 417         | 1.0 M KOH   | 5         |
| Co <sub>3</sub> FeP <sub>x</sub> O                                      | 10                         | 291         | 1.0 M KOH   | 6         |
| Co–P@NC-800                                                             | 10                         | 370         | 1.0 M KOH   | 7         |
| NiFe/NF                                                                 | 10                         | 262         | 1.0 M KOH   | 8         |
| CoS <sub>2</sub>                                                        | 10                         | 308         | 1.0 M KOH   | 9         |
| CoO <sub>x</sub> –4h                                                    | 10                         | 306         | 1.0 M KOH   | 10        |
| Ni–Fe–P                                                                 | 10                         | ~309        | 30 wt% KOH  | 11        |
| Fe–CoOOH/G                                                              | 10                         | 330         | 1.0 M KOH   | 12        |
| Ni <sub>0.69</sub> Fe <sub>0.31</sub> O <sub>x</sub> /C                 | 10                         | 280         | 1.0 M KOH   | 13        |
| CoMnON/N–rGO                                                            | 10                         | 350         | 1.0 M KOH   | 14        |
| Ni <sub>0.5</sub> Co <sub>0.5</sub> O <sub>x</sub>                      | 10                         | 360         | 1.0 M KOH   | 15        |
| PtNi                                                                    | 10                         | 350         | 0.1 M KOH   | 16        |
| Au <sub>1</sub> N <sub>x</sub> singlesite/C <sub>3</sub> N <sub>4</sub> | 10                         | ~450 mV     | 1.0 M KOH   | 17        |
| Co–doped Ni–Mn LDH                                                      | 10                         | ~310        | 1.0 M KOH   | 18        |
| NiS                                                                     | 10                         | 354         | 1.0 M KOH   | 19        |
| FeNiP@N–CFs                                                             | 10                         | 300         | 1.0 M KOH   | 20        |
| Ni <sub>59</sub> Cu <sub>19</sub> P <sub>9</sub>                        | 10                         | 307         | 1.0 M KOH   | 21        |
| Co <sub>9</sub> S <sub>8</sub>                                          | 10                         | 285         | 1.0 M KOH   | 22        |
| SL–Co(OH) <sub>2</sub>                                                  | 10                         | 350         | 1.0 M KOH   | 23        |
| a–CoVOx                                                                 | 10                         | 347         | 1.0 M KOH   | 24        |
| Cu <sub>2</sub> O@C                                                     | 10                         | 330         | 1.0 M KOH   | 25        |

**Table S2.** Comparison of TOF for FeS–NiS/TM with other non-noble-metal OER electrocatalysts in alkaline media.

| Catalyst                                     | j (mA cm <sup>-2</sup> ) | TOF (mol O <sub>2</sub> s <sup>-1</sup> ) | Electrolyte | Ref.      |
|----------------------------------------------|--------------------------|-------------------------------------------|-------------|-----------|
| FeS–NiS/TM                                   | 500                      | 0.521                                     | 1.0 M KOH   | This work |
| NiCo <sub>2</sub> O <sub>4</sub> @Ni–Co–B/CC | 500                      | 0.019                                     | 1.0 M KOH   | 26        |
| Co–MoF/NF                                    | 400                      | 0.180                                     | 1.0 M KOH   | 27        |
| Ni <sub>3</sub> S <sub>2</sub> @G            | 220                      | 0.035                                     | 1.0 M KOH   | 28        |
| Co <sub>9</sub> S <sub>8</sub>               | 285                      | 0.0268                                    | 1.0 M KOH   | 29        |
| NiTe                                         | 400                      | 0.324                                     | 1.0 M KOH   | 30        |
| NiFe                                         | 400                      | 0.075                                     | 1.0 M KOH   | 31        |

## References

- 1 J. Cruz, V. Baglio, S. Siracusano, V. Antonucci, A. Aricò, R. Ornelas, L. Ortiz-Frade, G. Osorio-Monreal, S. Durón-Torres and L. Arriaga, *J. Electrochem. Sci.*, 2011, **6**, 6607–6619.
- 2 S. Xue, L. Chen, Z. Liu, H. Cheng and W. Ren, *ACS Nano*, 2018, **12**, 5297–5305.
- 3 L. Ai, T. Tian and J. Jiang, *ACS Sustainable Chem. Eng.*, 2017, **5**, 4771–4777.
- 4 L. Stern, L. Feng, F. Song and X. Hu, *Energy Environ. Sci.*, 2015, **8**, 2347–2351.
- 5 L. Yang, M. Gao, B. Dai, X. Guo, Z. Liu and B. Peng, *Electrochim. Acta*, 2016, **191**, 813–820.
- 6 D. Badu, Y. Huang, G. Anandhababu, M. Ghausi and Y. Wang, *ACS Appl. Mater. Interfaces*, 2017, **9**, 38621–38628.
- 7 M. Zhai, F. Wang and H. Du, *ACS Appl. Mater. Interfaces*, 2017, **9**, 40171–40179.
- 8 Z. Wang and L. Zhang, *Electrochem. Commun.*, 2018, **88**, 29–33.
- 9 Y. Hua, H. Jiang, H. Jiang, H. Zhang and C. Li, *Electrochim. Acta*, 2018, **278**, 219–225.
- 10 W. Xu, F. Lyu, Y. Bai, A. Gao, J. Feng, Z. Gai and Y. Yin, *Nano Energy*, 2018, **43**, 110–116.
- 11 J. Lian, Y. Wu, H. Zhang, S. Gu, Z. Zeng and X. Ye, *Int. J. Hydrogen Energy*, 2018, **43**, 12929–12938.
- 12 X. Han, C. Yu, S. Zhou, C. Zhao, H. Huang, J. Yang, Z. Liu, J. Zhao and J. Qiu, *Adv. Energy Mater.*, 2017, **7**, 1602148.
- 13 Y. Qiu, L. Xin and W. Li, *Langmuir*, 2014, **30**, 7893–7901.
- 14 Z. Yan, H. Qi, X. Bai, K. Huang, Y. Chen and Q. Wang, *Electrochim. Acta*, 2018, **283**, 548–559.
- 15 L. Trotochaud, J. K. Ranney, K. N. Williams and S. W. Boettcher, *J. Am. Chem. Soc.*, 2012, **134**, 17253–17261.
- 16 G. Zhang and S. Wollner, *Applied Catalysis B: Environmental*, 2018, **222**, 26–34.
- 17 L. Liu, H. Su, F. Tang, X. Zhao and Q. Liu, *Nano Energy*, 2018, **46**, 110–116.
- 18 Y. Wang, X. Liu, N. Zhang, G. Qiu and R. Ma, *Applied Clay Science*, 2018, **165**,

277–283.

- 19 W. Dai, Y. Pan, N. Wang, S. Wu, X. Li, Y. Zhu and T. Lu, *Materials Letters*, 2018, **218**, 115–118.
- 20 R. Mo, S. Wang, H. Li, J. Li, S. Yang and J. Zhong, *Electrochimica Acta*, 2018, **290**, 649–656.
- 21 B. Kim, S. Kim, S. Cho and J. Kim, *Applied Catalysis B: Environmental*, 2018, **237**, 409–415.
- 22 X. Feng, Q. Jiao, T. Liu, Q. Li, M. Yin, Y. Zhao, H. Li, C. Feng and W. Zhou, *ACS Sustainable Chem. Eng.*, 2018, **6**, 1863–1871.
- 23 P. Jash, P. Srivastava and A. Paul, *Chem. Commun.*, 2019, **55**, 2230–2233.
- 24 L. Liardet and X. Hu, *ACS Catal.*, 2018, **8**, 644–650.
- 25 H. Zhang, Z. Zhang, N. Li, W. Yan and Z. Zhu, *Journal of Catalysis*, 2017, **352**, 239–245.
- 26 X. Ji, X. Ren, S. Hao, F. Xie, F. Qu, G. Du, A. Asirif and X. Sun, *Inorg. Chem. Front.*, 2017, **4**, 1546–1550.
- 27 X. Zhang, W. Sun, H. Du, R. Kong and F. Qu, *Inorg. Chem. Front.*, 2018, **5**, 344–347.
- 28 J. Yu, Y. Du, Q. Li, L. Zhen, V. Dravid, J. Wu and C. Xu, *Appl. Surf. Sci.*, 2019, **465**, 772–779.
- 29 X. Feng, Q. Jiao, T. Liu, Q. Li, M. Yin, Y. Zhao, H. Li, C. Feng and W. Zhou, *ACS Sustainable Chem. Eng.*, 2018, **6**, 1863–1871.
- 30 Z. Wang and L. Zhang, *Electrochim. Commun.*, 2018, **88**, 29–33.
- 31 X. Lu and C. Zhao, *Nat. Commun.*, 2015, **6**, 6616.
